# Supplementary material for: Rubber-like PTFE Thin Coatings Deposited by Pulsed Electron Beam Deposition (PED) Method
Source: MDPI journal article supplement (doi:10.3390/polym16091205), 2024-04-25
Supplement: s1 [file s1]

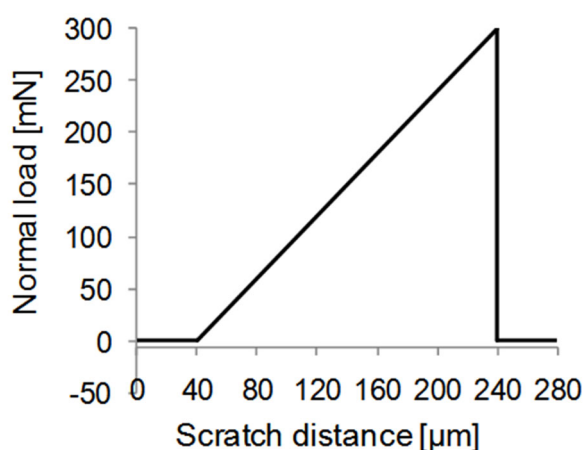

**Figure S1.** Normal force variation during scratch tests versus sliding distance. Increase of load began after 40  $\mu\text{m}$  and the maximum value of 300mN was reached 40  $\mu\text{m}$  before the end of the tip movement.

**Table S1.** Designated areas and maxima of individual bands achieved by the IR spectra deconvolution.

| PTFE_11                          |        |                | PTFE_5                           |        |                | PTFE_3                           |        |                | PTFE_target                      |         |                |
|----------------------------------|--------|----------------|----------------------------------|--------|----------------|----------------------------------|--------|----------------|----------------------------------|---------|----------------|
| Band max.<br>[cm <sup>-1</sup> ] | area   | Band ratio [%] | Band max.<br>[cm <sup>-1</sup> ] | area   | Band ratio [%] | Band max.<br>[cm <sup>-1</sup> ] | area   | Band ratio [%] | Band max.<br>[cm <sup>-1</sup> ] | area    | Band ratio [%] |
| 1233                             | 3.5401 | 41.8           | 1230                             | 5.8547 | 31.9           | 1230                             | 6.3013 | 31.6           | 1228                             | 9.6614  | 15.0           |
| 1201                             | 2.0807 | 24.6           | 1201                             | 4.8498 | 26.4           | 1202                             | 5.6943 | 28.6           | 1200                             | 16.1484 | 25.1           |
| 1180                             | 0.1392 | 1.6            | 1180                             | 0.2611 | 1.4            | 1181                             | 0.4458 | 2.2            | 1176                             | 7.1776  | 11.2           |
| 1155                             | 1.8740 | 22.1           | 1155                             | 4.5680 | 24.9           | 1155                             | 4.3807 | 22.0           | 1145                             | 25.8377 | 40.2           |
| 1121                             | 0.5443 | 6.4            | 1121                             | 1.7719 | 9.7            | 1125                             | 2.2486 | 11.3           | 1119                             | 3.3476  | 5.2            |
| 1090                             | 0.2853 | 3.4            | 1090                             | 1.0533 | 5.7            | 1090                             | 0.8488 | 4.3            | 1094                             | 2.1037  | 3.3            |
